# Supplementary material for: A Research Agenda for Helminth Diseases of Humans: Towards Control and Elimination
Source: PubMed Central journal article supplement (PMC3335858; doi:10.1371/journal.pntd.0001547), 2012-04-24
Supplement: pntd.0001547.s001.pdf [file pntd.0001547.s001.pdf]

Boatin BA, Basáñez M-G, Prichard RK, Awadzi K, Barakat RM, García HH, Gazzinelli A, Grant WN, McCarthy J, N'Goran EK, Osei-Atweneboana MY, Sripa B, Yang G-J, Lustigman S

**A Research Agenda for Helminth Diseases of Humans: Towards Control and Elimination**

**Table S1. TDR Disease-Specific and Thematic Reference Groups (DRGs/ TRGs) and their Host Countries**

| Reference group |                                                                                                | Host institution and country                                      |
|-----------------|------------------------------------------------------------------------------------------------|-------------------------------------------------------------------|
| <b>DRG1</b>     | Malaria                                                                                        | WHO Regional Office for Africa, Congo                             |
| <b>DRG2</b>     | Tuberculosis, leprosy and Buruli ulcer                                                         | WHO country office, Philippines                                   |
| <b>DRG3</b>     | Chagas disease, human African trypanosomiasis and leishmaniasis                                | WHO country offices, Sudan and Brazil                             |
| <b>DRG4</b>     | Helminth infections                                                                            | African Programme for Onchocerciasis Control (APOC), Burkina Faso |
| <b>DRG5</b>     | Dengue and other emerging viral diseases of public health importance                           | WHO country office, Cuba                                          |
| <b>DRG6</b>     | Zoonoses and marginalized infectious diseases of poverty                                       | WHO Regional Office for the Eastern Mediterranean, Egypt          |
| <b>TRG1</b>     | Social sciences and gender                                                                     | WHO country office, Ghana                                         |
| <b>TRG2</b>     | Innovation and technology platforms for health interventions in infectious diseases of poverty | WHO country office, Thailand                                      |
| <b>TRG3</b>     | Health systems and infectious disease control programmes                                       | WHO country office, Nigeria                                       |
| <b>TRG4</b>     | Environment, agriculture and infectious diseases of poverty                                    | WHO country office, China                                         |
