# Supplementary material for: A Research Agenda for Helminth Diseases of Humans: Towards Control and Elimination
Source: PubMed Central journal article supplement (PMC3335858; doi:10.1371/journal.pntd.0001547), 2012-04-24
Supplement: pntd.0001547.s002.pdf [file pntd.0001547.s002.pdf]

Boatin BA, Basáñez M-G, Prichard RK, Awadzi K, Barakat RM, García HH, Gazzinelli A, Grant WN, McCarthy J, N'Goran EK, Osei-Atweneboana MY, Sripa B, Yang G-J, Lustigman S

**A Research Agenda for Helminth Diseases of Humans: Towards Control and Elimination**

**Table S2. Original DRG4 Group Members and Subjects for White Papers and Oral Presentations<sup>§</sup> for First Meeting, Burkina Faso, January 2010**

| Name                        | Subjects for White Papers and Oral Presentations                                                                                                                                                                                                                               |
|-----------------------------|--------------------------------------------------------------------------------------------------------------------------------------------------------------------------------------------------------------------------------------------------------------------------------|
| Sara Lustigman (Chair)      | Vaccines as an integrated and complementary control measure to MDA: filariases, schistosomiasis, STHs                                                                                                                                                                          |
| Boakye A. Boatin (Co-Chair) | Operations research; challenges and needs to help fill programmatic gaps: onchocerciasis, LF, schistosomiasis; community-directed interventions                                                                                                                                |
| Kwablah Awadzi              | Surveillance for drug resistance; identification of sub-optimal responders to anthelmintic treatment; clinical trials for new anti-filarial drugs                                                                                                                              |
| Rashida M. Barakat          | Operational studies/challenges to control schistosomiasis in Africa; disease burden; diagnosis; praziquantel resistance                                                                                                                                                        |
| María-Gloria Basáñez        | Epidemiological, parasitological, and transmission patterns of helminth infections; mathematical models to support control strategies and help predict the success of control interventions                                                                                    |
| Héctor H. García            | Present research on taeniasis/cysticercosis; what is needed to control/prevent these infections, regional differences between continents                                                                                                                                       |
| Andrea Gazzinelli           | Control/prevention strategies of poly-parasitism; integrated control programmes; social ecology of helminthiasis; gender issues; health systems                                                                                                                                |
| Warwick N. Grant            | New tools for drug discovery and development; tools for monitoring of drug resistance                                                                                                                                                                                          |
| James McCarthy              | Diagnosis of helminth infections; present tools for estimating disease burden; prediction of success of MDA; what is needed to support precise diagnosis when infection or disease burdens are low; integration of new tools, improvement of existing tools                    |
| Eliézer K. N'Goran          | Role of geospatial tools for disease risk mapping; surveillance and predictions for resource allocation in order to achieve the goals of integrated and sustainable control measures of helminth infections in Africa; prospects and challenges of integrated control measures |
| Roger K. Prichard           | MDA-based control measures and potential emergence of drug resistance; gaps in surveillance, parasite genetic assays in onchocerciasis, LF, STHs                                                                                                                               |
| Banchob Sripa               | Operational studies/challenges to control/prevent trematode and cestode infections/diseases with particular emphasis on those unique to Southeast Asia vs. Africa or other regions                                                                                             |
| Guo-Jing Yang               | New integrated strategies to control transmission of schistosomiasis; lessons from China and Southeast Asia; the influence of climate and environmental change on disease burden and control measures                                                                          |

<sup>§</sup>In addition to the presentations by DRG4 group members, Dr Piero L. Olliaro, in representation of the NTD Department of the WHO and TDR delivered presentations on: “Preventive chemotherapy and transmission control: issues related to research in the field of helminthiasis”; “Addressing resistance development in tropical disease pathogens”, and “Research priorities for human anthelmintics”.
